# Supplementary material for: Where are the children in national hepatitis C policies? A global review of national strategic plans and guidelines
Source: PubMed Central journal article supplement (PMC7898178; doi:10.1016/j.jhepr.2021.100227), 2021-01-15
Supplement: mmc1.pdf [file mmc1.pdf]

# **Where are the children in national hepatitis C policies? A global review of national strategic plans and guidelines**

Farihah Malik, Heather Bailey, Polin Chan, Intira Jeannie Collins, Antons Mozalevskis, Claire Thorne, Philippa Easterbrook

|                   |   |
|-------------------|---|
| Table of contents |   |
| Table S1.....     | 2 |
| Table S2.....     | 3 |
| References.....   | 6 |

Table S1. Summary of national plans and clinical guideline documents reviewed, by WHO region and income classification

|                           | All member states | Countries for which any policy document available | Both NSP and guidelines available | NSP only        | Guideline only  |
|---------------------------|-------------------|---------------------------------------------------|-----------------------------------|-----------------|-----------------|
|                           | A                 | B (as % of A)                                     | C (as % of B)                     | D (as % of B)   | E (as % of B)   |
| <b>Total</b>              | <b>194</b>        | <b>122 (63%)</b>                                  | <b>43 (35%)</b>                   | <b>58 (48%)</b> | <b>21 (17%)</b> |
| By WHO region:            |                   |                                                   |                                   |                 |                 |
| African                   | 47                | 20 (43%)                                          | 3 (15%)                           | 16 (80%)        | 1 (5%)          |
| Eastern Mediterranean     | 21                | 10 (48%)                                          | 1 (10%)                           | 7 (70%)         | 2 (20%)         |
| European                  | 53                | 44 (83%)                                          | 21 (48%)                          | 13 (30%)        | 10 (23%)        |
| Americas                  | 35                | 22 (63%)                                          | 6 (27%)                           | 12 (55%)        | 4 (18%)         |
| South-East Asia           | 11                | 11 (100%)                                         | 6 (55%)                           | 4 (36%)         | 1 (9%)          |
| Western Pacific           | 27                | 15 (56%)                                          | 6 (40%)                           | 6 (40%)         | 3 (20%)         |
| By income classification: |                   |                                                   |                                   |                 |                 |
| High-income               | 57                | 46 (81%)                                          | 19 (41%)                          | 17 (37%)        | 10 (22%)        |
| Upper middle-income       | 58                | 32 (55%)                                          | 11 (34%)                          | 12 (38%)        | 9 (28%)         |
| Lower middle-income       | 46                | 27 (59%)                                          | 11 (41%)                          | 14 (52%)        | 2 (7%)          |
| Low-income                | 31                | 17 (55%)                                          | 2 (12%)                           | 15 (88%)        | 0               |
| #N/A                      | 2                 | 0                                                 | 0                                 | 0               | 0               |

Table S2. Diagnostic pathways in countries that recommend testing children born to women with HCV

| Service delivery considerations for children born to women with HCV |                                                                                                                                                                                                                                                                    |                                                                                                                                                   |
|---------------------------------------------------------------------|--------------------------------------------------------------------------------------------------------------------------------------------------------------------------------------------------------------------------------------------------------------------|---------------------------------------------------------------------------------------------------------------------------------------------------|
| Country                                                             | Testing recommendations<br><i>How to test? When to test? Where to test?</i>                                                                                                                                                                                        | Follow up practices after initial test                                                                                                            |
| <b>Argentina</b>                                                    | HCV RNA test at age 3 to 6 months (If the mother has viraemia > 106 IU ml and/or coinfection with HIV, has a higher risk of transmission)                                                                                                                          | If RNA positive then repeat RNA after 3/4 months<br>If RNA negative then test antibody and RNA after 18 months                                    |
| <b>Armenia</b>                                                      | Not specified                                                                                                                                                                                                                                                      | Not specified                                                                                                                                     |
| <b>Australia</b>                                                    | HCV RNA test at age 2 months and again at 3-4 months later.<br>HCV antibody test at 18 months of age.                                                                                                                                                              | If both RNA tests are positive, referral to a Paediatric Gastroenterology or Infectious Diseases Unit for 6 monthly monitoring of liver function. |
| <b>Bahrain</b>                                                      | HCV antibody test after 12 months of age.<br><i>Option to perform HCV RNA test at or after the infant's first well-child visit at age 1-2 months.</i>                                                                                                              | Not specified                                                                                                                                     |
| <b>Belarus</b>                                                      | Not specified                                                                                                                                                                                                                                                      | Not specified                                                                                                                                     |
| <b>Belgium</b>                                                      | HCV RNA test at age 1 month.                                                                                                                                                                                                                                       | Not specified                                                                                                                                     |
| <b>Bhutan</b>                                                       | Not specified                                                                                                                                                                                                                                                      | Not specified                                                                                                                                     |
| <b>Canada</b>                                                       | Not specified                                                                                                                                                                                                                                                      | Not specified                                                                                                                                     |
| <b>Chile</b>                                                        | HCV antibody test after age 18 months.<br><i>Option to perform HCV RNA test at age 3 months.</i>                                                                                                                                                                   | If antibody positive, confirmation with HCV RNA test.                                                                                             |
| <b>Czech Republic</b>                                               | HCV antibody test after age 18 months.                                                                                                                                                                                                                             | Not specified                                                                                                                                     |
| <b>Dominican Republic</b>                                           | HCV antibody test after age 18 months and two HCV RNA tests at an interval of 3-6 months.                                                                                                                                                                          | Not specified                                                                                                                                     |
| <b>Egypt*</b>                                                       | Not specified                                                                                                                                                                                                                                                      | Not specified                                                                                                                                     |
| <b>Germany</b>                                                      | HCV RNA test at age 6 months for children of <b>HCV RNA+ mothers</b> .<br>HCV antibody test at 15 months for children of <b>HCV antibody+, HCV RNA – mothers</b> .<br><i>Tests for transaminase levels, RNA quantification and genotyping should be performed.</i> | Long-term follow up indicated but details not specified.                                                                                          |
| <b>Hungary</b>                                                      | HCV antibody test after age 18 months for children of HCV antibody+ mothers.<br><i>Option to perform HCV RNA test at age 1-2 months.</i>                                                                                                                           | If antibody positive, refer to paediatric hepatologist and confirmation with HCV RNA test.                                                        |

|                           |                                                                                                                                                                                                                                                                                                                                             |                                                                                                                                                                  |
|---------------------------|---------------------------------------------------------------------------------------------------------------------------------------------------------------------------------------------------------------------------------------------------------------------------------------------------------------------------------------------|------------------------------------------------------------------------------------------------------------------------------------------------------------------|
| <b>India*</b>             | HCV antibody test after age 18 months.<br><i>Option to perform HCV RNA test after age 2 months.</i>                                                                                                                                                                                                                                         | Not specified                                                                                                                                                    |
| <b>Ireland</b>            | HCV RNA test at age 6 weeks and again at age 6 months for children of <b>HCV RNA+ mothers.</b><br>HCV antibody test after age 18 months for children of <b>HCV antibody+, HCV RNA- mothers.</b><br>No tests for children of <b>HCV antibody+, HCV RNA- women with assured eradication of infection and no ongoing risk for reinfection.</b> | If RNA negative on both occasions, test for HCV antibody after age 18 months.<br><br>If RNA or antibody positive, refer to Rainbow Clinic (specialist services). |
| <b>Kazakhstan</b>         | Not specified                                                                                                                                                                                                                                                                                                                               | Not specified                                                                                                                                                    |
| <b>Korea, Republic of</b> | HCV antibody test after age 18 months.<br><i>Option to perform HCV RNA test after age 6 months.</i>                                                                                                                                                                                                                                         | Not specified                                                                                                                                                    |
| <b>Kyrgyzstan</b>         | HCV antibody test after age 12 months for children of HCV antibody+ and HCV RNA+ mothers.<br><b>No test for children of HCV antibody+, HCV RNA- mothers.</b><br><i>Option to perform HCV RNA test after age 2 months.</i>                                                                                                                   | If antibody positive or born to mother with HCV/ HIV co-infection, confirmation with HCV RNA test.<br><br>If RNA positive, repeat RNA test.                      |
| <b>Latvia</b>             | HCV antibody test after age 18 months.<br><i>Option to perform HCV RNA test after age 4 months.</i>                                                                                                                                                                                                                                         | Not specified                                                                                                                                                    |
| <b>Lebanon</b>            | HCV antibody test after age 18 months.                                                                                                                                                                                                                                                                                                      | Not specified                                                                                                                                                    |
| <b>Malaysia</b>           | HCV antibody test after age 18 months.                                                                                                                                                                                                                                                                                                      | Not specified                                                                                                                                                    |
| <b>Maldives</b>           | HCV antibody test after age 18 months.<br><i>Option to perform HCV RNA test between 0 - 12 months.</i>                                                                                                                                                                                                                                      | Not specified                                                                                                                                                    |
| <b>Mongolia</b>           | HCV antibody test after age 18 months.<br><i>Option to perform HCV RNA test between 0-12 months, preferably between 2-6 months.</i>                                                                                                                                                                                                         | If antibody positive, confirmation with HCV RNA test at age 3 years.                                                                                             |
| <b>Morocco</b>            | Not specified                                                                                                                                                                                                                                                                                                                               | Not specified                                                                                                                                                    |
| <b>Myanmar</b>            | HCV RNA test at age 3 months.                                                                                                                                                                                                                                                                                                               | If HCV RNA positive, repeat RNA test at 12 months to confirm.<br>If HCV RNA negative, monitor ALT levels every 3 months.                                         |
| <b>Nepal</b>              | Test after age 18 months.                                                                                                                                                                                                                                                                                                                   | Not specified                                                                                                                                                    |
| <b>Nigeria*</b>           | Not specified                                                                                                                                                                                                                                                                                                                               | Not specified                                                                                                                                                    |
| <b>Norway</b>             | Not specified                                                                                                                                                                                                                                                                                                                               | Not specified                                                                                                                                                    |
| <b>Pakistan*</b>          | Not specified                                                                                                                                                                                                                                                                                                                               | Not specified                                                                                                                                                    |
| <b>Philippines</b>        | HCV antibody test after age 18 months.                                                                                                                                                                                                                                                                                                      | Not specified                                                                                                                                                    |

|                                 |                                                                                                                                                           |                                                                                                                                                                                                                                                                                                                                                                     |
|---------------------------------|-----------------------------------------------------------------------------------------------------------------------------------------------------------|---------------------------------------------------------------------------------------------------------------------------------------------------------------------------------------------------------------------------------------------------------------------------------------------------------------------------------------------------------------------|
| <b>Russian Federation*</b>      | HCV RNA test at age 2 months and if positive, again at 2-6 weeks later.                                                                                   | If HCV RNA negative at age 2, 6, and 12 months AND antibody negative at age 12 months, remove from follow-up.<br>If HCV RNA negative at age 2, 6, and 12 months AND antibody positive at age 12 months, re-examine at 18 months.<br>If HCV RNA positive at 2 or 6 months and HCV RNA negative at 12 months, conduct HCV RNA and antibody tests at 18 and 24 months. |
| <b>Singapore</b>                | HCV antibody test after age 12 months.                                                                                                                    | Not specified                                                                                                                                                                                                                                                                                                                                                       |
| <b>Spain</b>                    | HCV antibody test after age 18 months.<br><i>Option to perform HCV RNA test.</i>                                                                          | Not specified                                                                                                                                                                                                                                                                                                                                                       |
| <b>Sweden</b>                   | HCV antibody test after age 18 months.                                                                                                                    | If antibody positive, confirm with HCV RNA test.<br>If CHC confirmed, monitor liver function annually and HCV RNA quantification every 2-3 years.                                                                                                                                                                                                                   |
| <b>Thailand</b>                 | Not specified                                                                                                                                             | Not specified                                                                                                                                                                                                                                                                                                                                                       |
| <b>Timor-Leste</b>              | HCV antibody test after age 18 months.                                                                                                                    | If antibody positive, repeat antibody test or confirm with HCV RNA test.                                                                                                                                                                                                                                                                                            |
| <b>Turkey</b>                   | Not specified                                                                                                                                             | Not specified                                                                                                                                                                                                                                                                                                                                                       |
| <b>Ukraine**</b>                | HCV antibody test after age 18 months.<br><i>Option to perform HCV RNA test at age 2-18 months.</i>                                                       | If antibody positive, test HCV RNA.<br>If HCV RNA positive, repeat RNA test after 12 months to confirm.                                                                                                                                                                                                                                                             |
| <b>United Kingdom</b>           | HCV RNA test at age 2-3 months.                                                                                                                           | Not specified                                                                                                                                                                                                                                                                                                                                                       |
| <b>United States of America</b> | HCV antibody test after age 18 months.<br><i>Option to perform HCV RNA test during the first year of life, but optimal timing of such a test unknown.</i> | If antibody positive, confirm with HCV RNA test after age 3 years.                                                                                                                                                                                                                                                                                                  |
| <b>Uzbekistan*</b>              | HCV antibody test after age 18 months.                                                                                                                    | Not specified                                                                                                                                                                                                                                                                                                                                                       |

\*indicates countries with a high paediatric HCV burden (1,2)

# Ukraine has since adopted WHO and EASL guidelines as the national guidelines.

## References

1. El-Sayed MH, Razavi H. Global estimate of HCV infection in the pediatric and adolescent population. *J Hepatol.* 2015;62(Table 1):S831–2.
2. Razavi H, El-Sayed MH. Updated Global Estimate of HCV Infection in the Pediatric Population [Internet]. 2016. Available from: [https://cdafound.org/content/Downloads/Pediatric Prevalence 161201.pdf](https://cdafound.org/content/Downloads/Pediatric%20Prevalence%20161201.pdf)
